# Supplementary material for: Molecular requirements for the formation of a kinetochore–microtubule interface by Dam1 and Ndc80 complexes
Source: PubMed Central journal article supplement — J Cell Biol. 2013 Jan 7;200(1):21–30. doi: 10.1083/jcb.201210091 (PMC3542791; doi:10.1083/jcb.201210091), 2013-01-07
Supplement: supp_jcb.201210091_JCB_201210091_sm.pdf [file supp_jcb.201210091_JCB_201210091_sm.pdf]

Lampert et al., <http://www.jcb.org/cgi/content/full/jcb.201210091/DC1>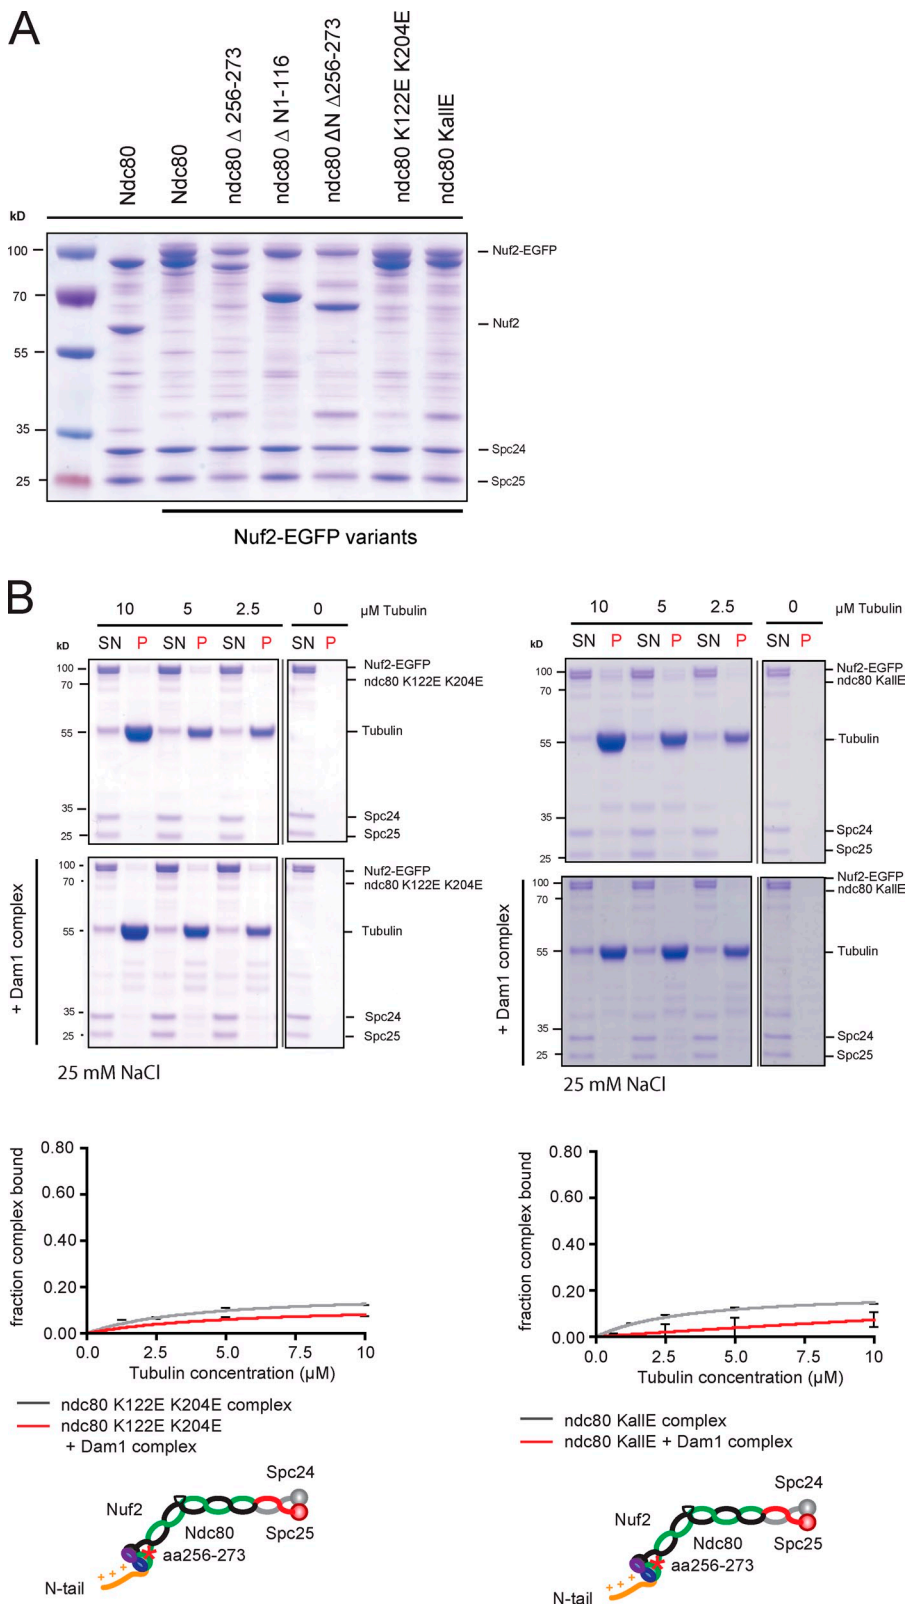

Figure S1. **Selective inhibition of the Ndc80 CH-domain eliminates the microtubule-binding ability of the complex.** (A) Coomassie-stained gel of recombinant wild-type and mutant Ndc80 complexes. (B) Coomassie-stained gels of microtubule co-pelleting assays and corresponding binding curves for the *ndc80 K122E K204E* mutant, with or without inclusion of Dam1. The Ndc80 CH-domain mutant is unable to bind microtubules in the presence or absence of the Dam1 complex, even under low salt conditions ( $n = 3$ ; error bars represent standard error). Identical results were obtained with the Ndc80 CH-domain mutant where all six conserved lysine residues were replaced with glutamic acid.

Figure S2. **Characterization of Ndc80 anchor-away phenotypes.** (A) Schematic illustration of the anchor-away approach based on Haruki et al. (2008). (B) Schematic illustration of the experimental time-course for Ndc80 anchor-away (AA) strains (top). Prolonged rapamycin exposure strongly affects Ndc80-FRB-GFP localization, whereas DMSO-treated cells show the characteristic kinetochore localization pattern ( $n \geq 25$  from two independent experiments, average signal intensity [a.u.] was normalized to the average intensity of DMSO-treated control cells). Bars, 4  $\mu\text{m}$ . Corresponding quantification of Ndc80-FRB-GFP kinetochore signal intensity after background subtraction (left). (C) Western blot analysis on whole-cell extracts probing the expression of mutant *ndc80-3xHA* proteins in the Ndc80-AA background. (C) Serial dilution spot assay of *Dam1-3xGFP* imaging strains in the Ndc80-AA background. Integration of the *ndc80*  $\Delta 256-273$  allele causes synthetic lethality, presumably through negative interference by the C-terminal 3xGFP tag fused to *Dam1*.

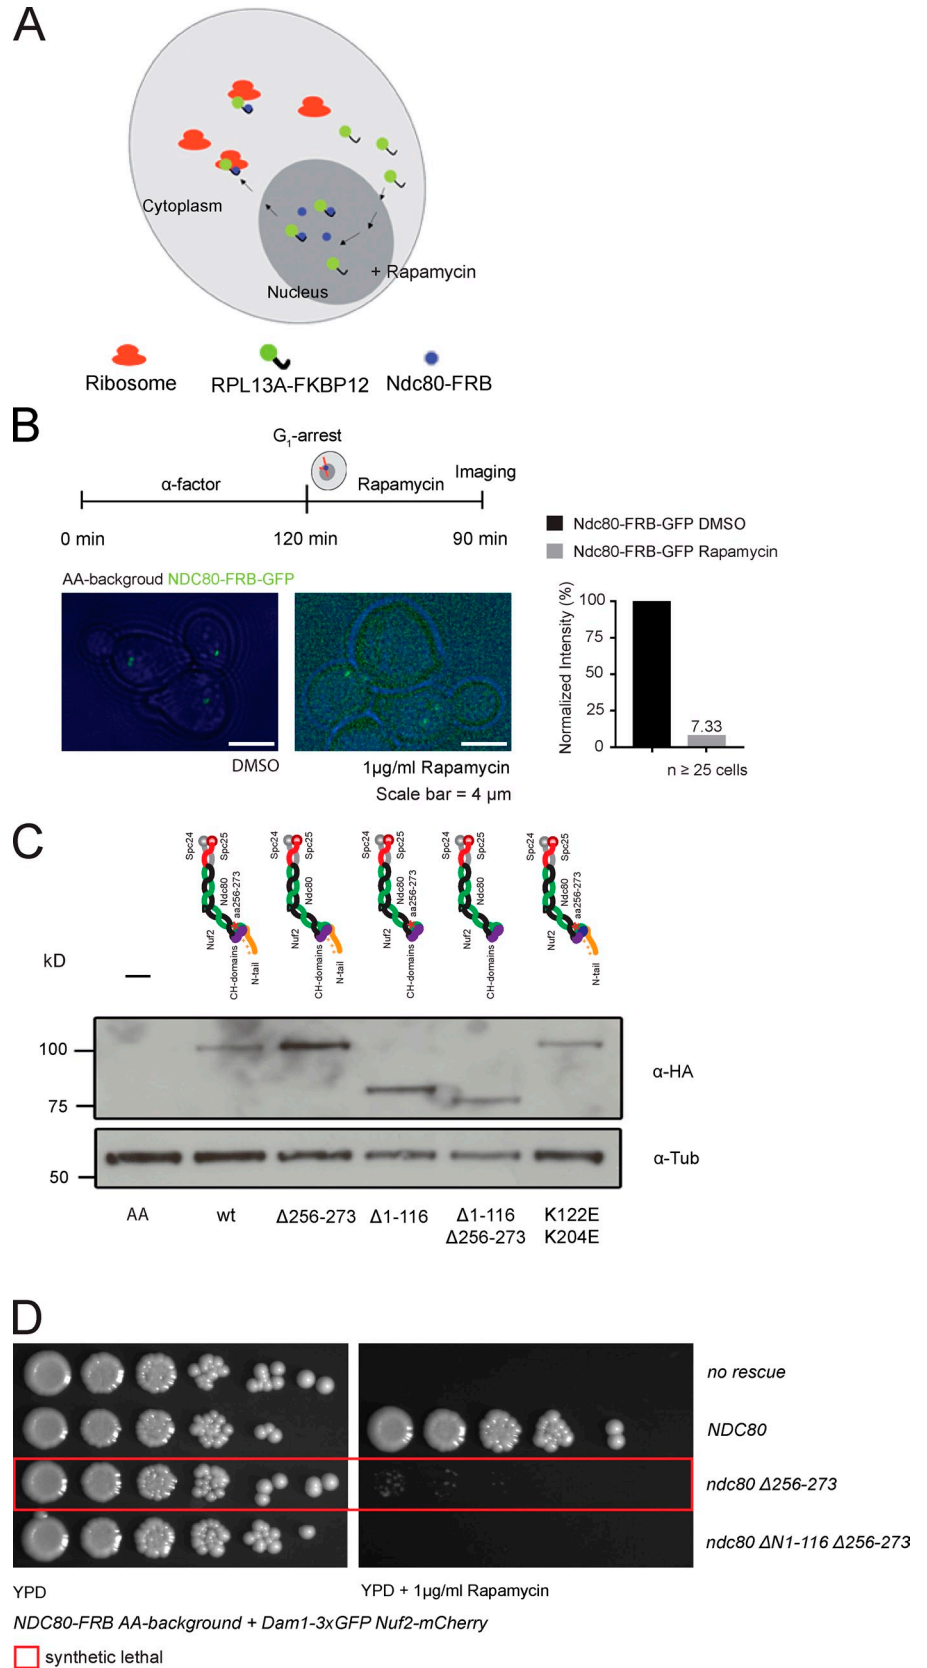

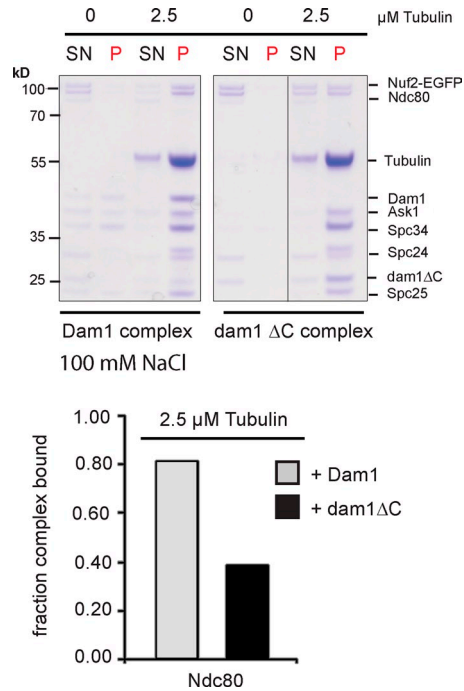

Figure S3. **The Dam1 ΔC complex shows a diminished Ndc80-recruitment activity.** (A) Representative Coomassie-stained gels (left) and corresponding quantification of a single experiment out of three repeats (right) of microtubule cosedimentation assays comparing wild-type Dam1 to the dam1 ΔC (Q205Stop) in Ndc80 complex recruitment. Although comparable amounts of the wild-type and mutant complex are bound to microtubules, lack of the C terminus of the Dam1 subunit results in lower Ndc80 enrichment in the pellet fraction. To balance the weakened intrinsic microtubule-binding activity of the Dam1 ΔC complex (Westermann et al., 2005), it was used in slightly higher concentration (0.75 μM vs. 0.5 μM) compared with wild type.

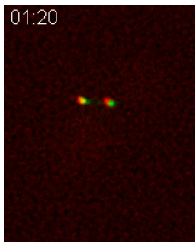

Video 1. **Time-lapse movie of a yeast cell expressing Dam1-3xGFP and Nuf2-mCherry.** The movie demonstrates typical Dam1 (green) and Nuf2 (red) localization patterns in a metaphase cell expressing Ndc80-FRB and wild-type Ndc80 in the presence of rapamycin. Frames were taken every 20 s for 5 min using a live-cell Deltavision Core Deconvolution system. This video corresponds to the experiment shown in the top left panel of Fig. 3 D.

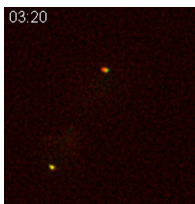

Video 2. **Time-lapse recording of an anaphase control cell expressing Dam1-3xGFP, Nuf2-mCherry, and wild-type Ndc80 in the Ndc80-FRB background.** The fluorescent signals of Nuf2 (red) and Dam1 (green) colocalize and have been distributed equally between the mother and daughter cell. Frames were taken every 20 s for 5 min using a live-cell Deltavision Core Deconvolution system. This video corresponds to the experiment shown in the top right panel of Fig. 3 D.

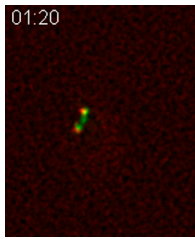

Video 3. **Time-lapse movie of a metaphase cell expressing Dam1-3xGFP and Nuf2-mCherry where Ndc80-FRB is largely sequestered into the cytoplasm.** In the absence of an Ndc80 rescue allele the signal intensity of Nuf2 (red) is markedly reduced and Dam1 (green) shows an elevated association with the mitotic spindle. Time-lapse interval was 20 s and images were recorded using a live-cell DeltaVision Core Deconvolution system. This video corresponds to the experiment shown in the bottom left panel of Fig. 3 D.

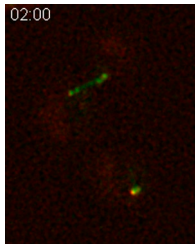

Video 4. **Time-lapse movie of a large-budded yeast cell expressing Dam1-3xGFP and Nuf2-mCherry where the bulk of Ndc80-FRB is mislocalized into the cytoplasm.** The cell arrests with a short spindle, reduced Nuf2 signal (red) at kinetochores, and increased levels of Dam1 (green) decorating microtubules. Frames were taken every 20 s for 5 min using a live-cell DeltaVision Core Deconvolution system. This video corresponds to the experiment shown in the bottom right panel of Fig. 3 D.

**Table S1 describes yeast strains used in this study and is provided as an Excel spreadsheet.**

## References

- Haruki, H., J. Nishikawa, and U.K. Laemmli. 2008. The anchor-away technique: rapid, conditional establishment of yeast mutant phenotypes. *Mol. Cell.* 31:925–932. <http://dx.doi.org/10.1016/j.molcel.2008.07.020>
- Westermann, S., A. Avila-Sakar, H.W. Wang, H. Niederstrasser, J. Wong, D.G. Drubin, E. Nogales, and G. Barnes. 2005. Formation of a dynamic kinetochore- microtubule interface through assembly of the Dam1 ring complex. *Mol. Cell.* 17:277–290. <http://dx.doi.org/10.1016/j.molcel.2004.12.019>
